# Supplementary material
Source: Springer Nature journal article supplement (https://www.springermedizin.de/resource/supplementary/12911_2012_543_MOESM4_ESM.pdf/9525798)
Supplement: MOESM4 [file 9525798]

**Additional file 4: Manager questionnaire**

| Items                                                                                                                                             | EHR implementation factor                                       |
|---------------------------------------------------------------------------------------------------------------------------------------------------|-----------------------------------------------------------------|
| 1) Adequate electronic data exchange among different clinical systems (system interoperability) is a facilitator to EHR implementation.           | Interoperability                                                |
| 2) Managers' concern that EHR use may compromise the security of patient information is a barrier to EHR implementation.                          | Privacy and security concerns (security of patient information) |
| 3) Managers' concern that EHR use may compromise patient privacy is a barrier to EHR implementation.                                              | Privacy and security concerns (patient privacy)                 |
| 4) Managers' concern about the high costs associated with EHR implementation and use is a barrier to EHR implementation.                          | Cost issues                                                     |
| 5) Managers' concern about patients' lack of familiarity with computers is a barrier to EHR implementation.                                       | Familiarity, ability with EHR                                   |
| 6) Managers' perception of the benefits of EHRs (for example, that EHRs will improve information sharing) is a facilitator to EHR implementation. | Outcome expectancy (benefits of EHR)                            |
| 7) Managers' concern about EHR use increasing physician workload is a barrier to EHR implementation.                                              | Lack of time and workload                                       |
| 8) Lack of technical support is a barrier to EHR implementation.                                                                                  | Human resources (IT support)                                    |
| 9) Lack of human resources (for example, extra staff) to support EHR implementation is a barrier to EHR implementation.                           | Resources available (for implementation)                        |
| 10) Lack of employee training is a barrier to EHR implementation.                                                                                 | Training                                                        |
| 11) Managers' concern about choosing an inappropriate EHR system is a barrier to EHR implementation.                                              | Choice of the EHR system                                        |
